# Supplementary material
Source: PubMed Central journal article supplement (PMC2761493)

## **Online supplemental materials**

**Supplemental Figure 1. StAR mRNA and protein levels following infection of StAR recombinant adenovirus.** THP-1 derived macrophages were infected with the indicated recombinant adenoviruses as described under “Methods”. StAR mRNA and protein levels were determined by real-time Quantitative RT-PCR (**A**) and Western blot analysis (**B**). The data represent means of three experiments  $\pm$  SD. Cont represents the cells were infected with null virus as control; EGFP, with recombinant adenovirus encoding CMV-EGFP as negative gene control; StAR, with adenovirus encoding CMV-StAR; # represents  $P < 0.05$  vs. Ad-CMV-EGFP.

**Supplemental Table 1. The primers used in this experiment**

| <b>Gene</b>   | <b>Primer Sense</b>     | <b>Primer Antisense</b>  |
|---------------|-------------------------|--------------------------|
| StAR          | TCTCTACTCGGTTCTCGG      | TCCTGCTGACTCTCCTTC       |
| ABCA1         | GGTGATGTTTCTGACCAATGTGA | TGTCCTCATACCAGTTGAGAGAC  |
| ABCG1         | CCAGAAGTCGGAGGCCATC     | AAGTCCAGGTACAGCTTGGCA    |
| LXR $\alpha$  | CATGGCACCAGATCCCCATAG   | GGGTAGCTGTTTAGCAAAGTCAA  |
| PPAR $\gamma$ | ATTGACCCAGAAAGCGATTCC   | TCTTCCATTACGGAGAGATCCAC  |
| CD36          | GCCAAGGAAAATGTAACCCAGG  | GCCTCTGTTCCA ACTGATAGTGA |
| CYP27A1       | AAGCGATACCTGGATGGTTG    | TGTTGGATGTCGTGTCCACT     |
| apoE          | GTCGCTTTTGGGATTACCTGC   | CCGGGGTCAGTTGTTCCCTC     |
| LDLr          | AGTTGGCTGCGTTAATGTGAC   | TGATGGGTTCATCTGACCAGT    |
| SREBP-1       | CAGCCCCACTTCATCAAGG     | ACTGTTGCCAAGATGGTTCCG    |
| SREBP-2       | AACGGTCATTCACCCAGGTC    | GGCTGAAGAATAGGAGTTGCC    |
| GAPDH         | CAATGACCCCTTCATTGACC    | TTGATTTTGGAGGGATCTCG     |

# Supplemental Fig. 1

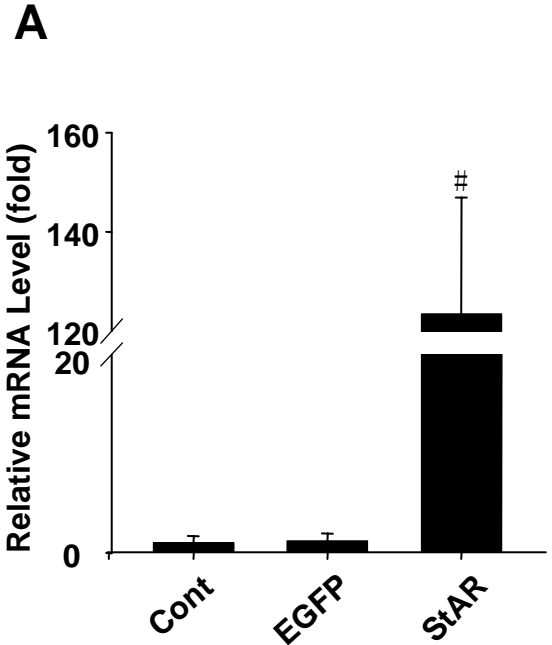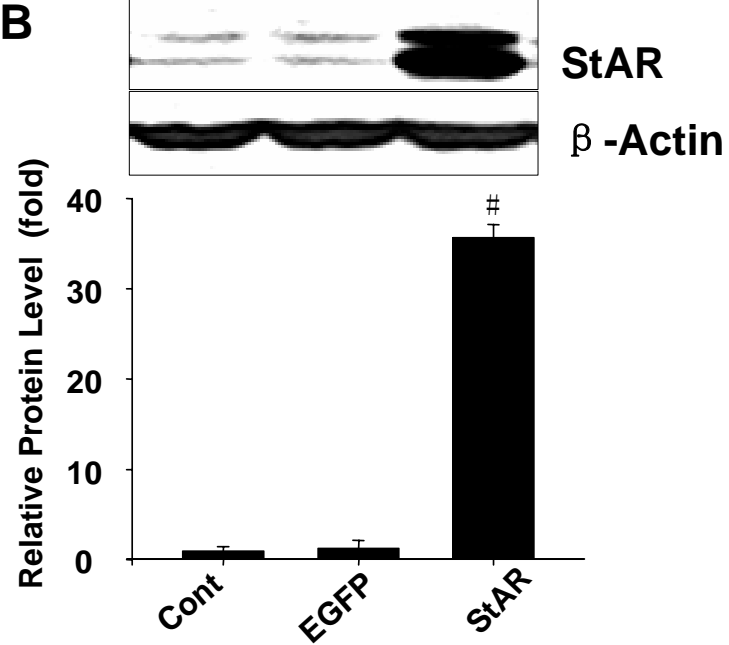

Supplement: NIHMS129529-supplement-Supplementary_Data.pdf [file NIHMS129529-supplement-Supplementary_Data.pdf]
